# Supplementary material for: The Cryo-EM structure of human CD163 bound to haptoglobin-hemoglobin reveals molecular mechanisms of hemoglobin scavenging
Source: PubMed Central journal article supplement — Nat Commun. 2024 Dec 30;15:10871. doi: 10.1038/s41467-024-55171-4 (PMC11685794; doi:10.1038/s41467-024-55171-4), 2024-12-30
Supplement: 41467_2024_55171_MOESM1_ESM.pdf [file 41467_2024_55171_MOESM1_ESM.pdf]

### **Supplementary Information**

The Cryo-EM structure of human CD163 bound to haptoglobin-hemoglobin reveals molecular mechanisms of hemoglobin scavenging.

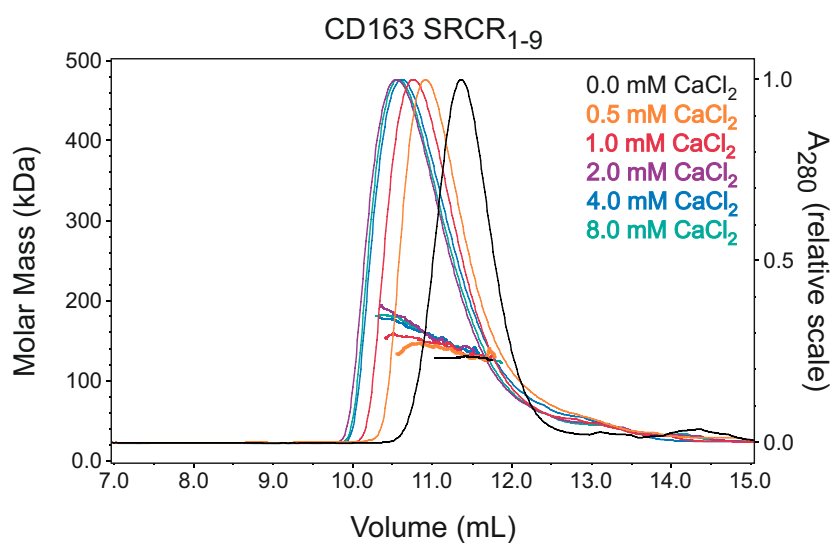

**Supplementary Figure 1. Calcium dependence of CD163 oligomerization.** SEC-MALS analysis of CD163 SRCR 1-9 in the presence of varying CaCl<sub>2</sub> concentrations. The measured molecular weights of the chromatogram peaks are shown as thick lines. This experiment used a 24 ml Superdex 200 Increase 10/300 GL column, in contrast to the 15 ml Wyatt SEC Analytical Column (WTC-030S5) used in the experiments shown in Figure 1. The larger sample dilution on the Superdex 200 Increase 10/300 GL column results in a slightly lower measurement of the sample mass likely due to complex dissociation.

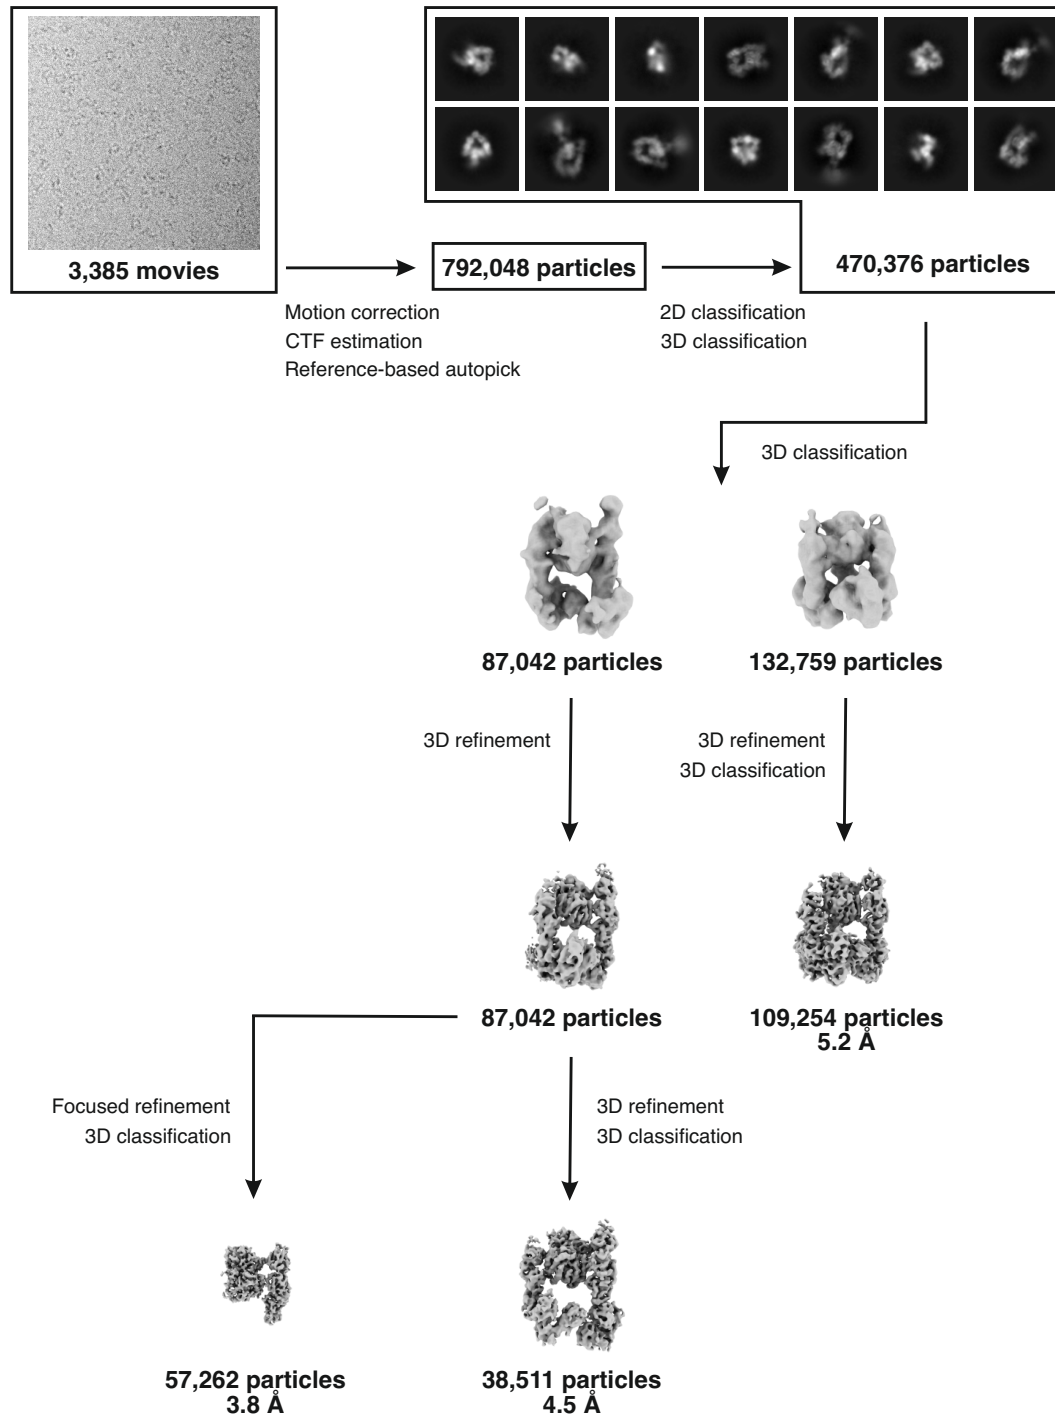

**Supplementary Figure 2. Cryo-EM data particle processing workflow.** Single particle analysis scheme for the CD1631-9-HpHb complex.

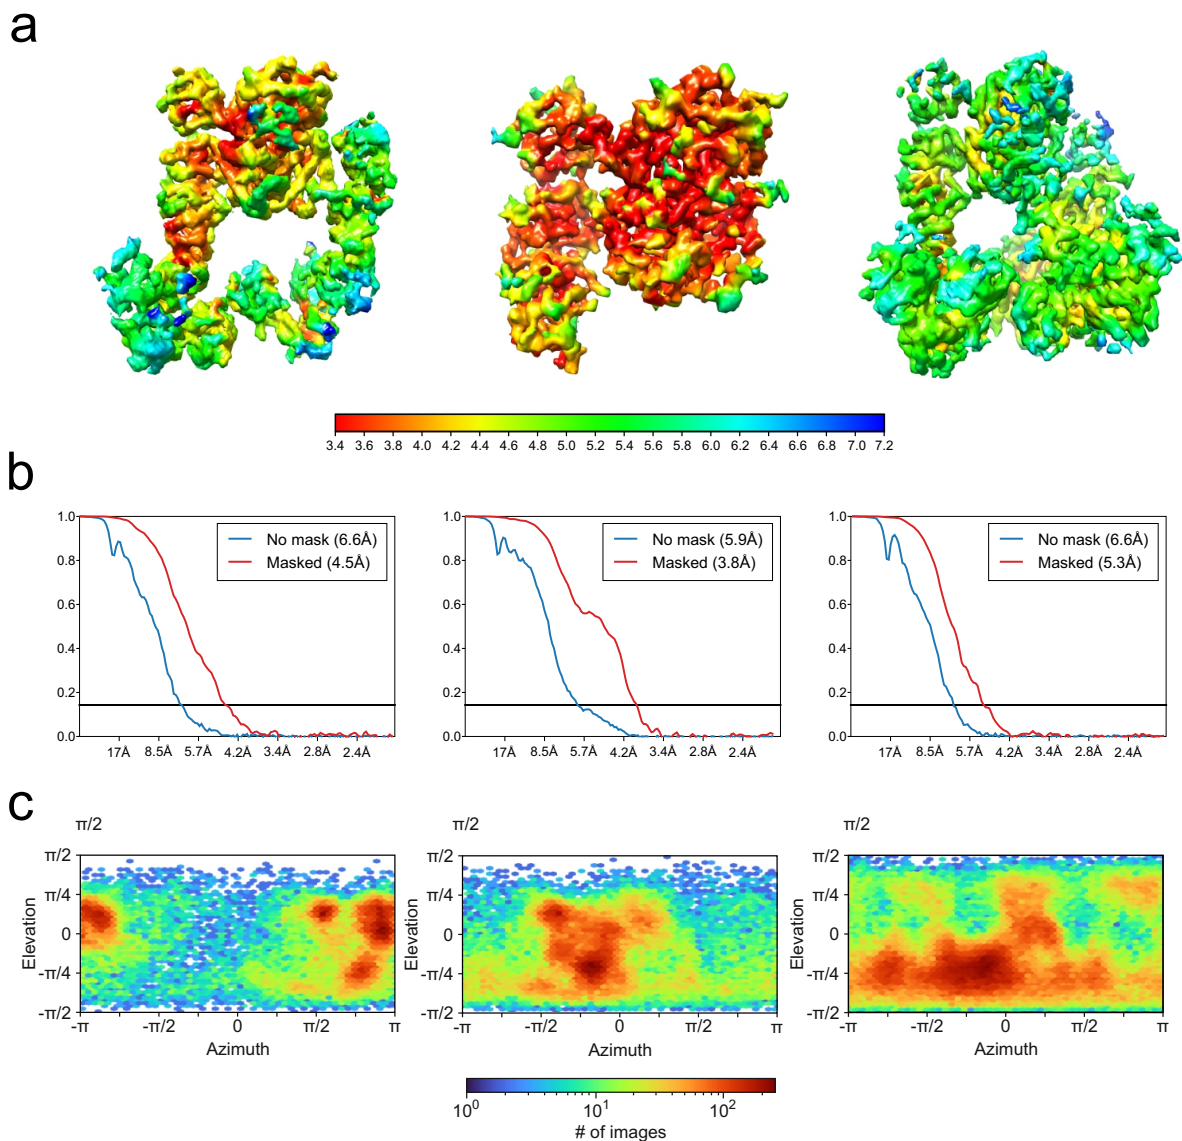

**Supplementary Figure 3. Local resolution maps of CD163-HpHb and Fourier shell correlation curves.** **a.** Local resolution maps of the cryo-EM maps presented in Figure 1. Left: CryoEM density map of dimeric CD163 SRCR 1-9 bound to HpHb (4.5 Å resolution), middle: CryoEM density map from focused refinement using a mask covering CD163-A SRCR 2-4 and HpHb (3.8 Å resolution), Right: CryoEM density map of trimeric CD163 SRCR 1-9 bound to HpHb (5.3 Å resolution). **b.** Fourier shell correlation curves of the maps shown in **a.** **c.** Viewing direction distribution of the maps shown in **a.**

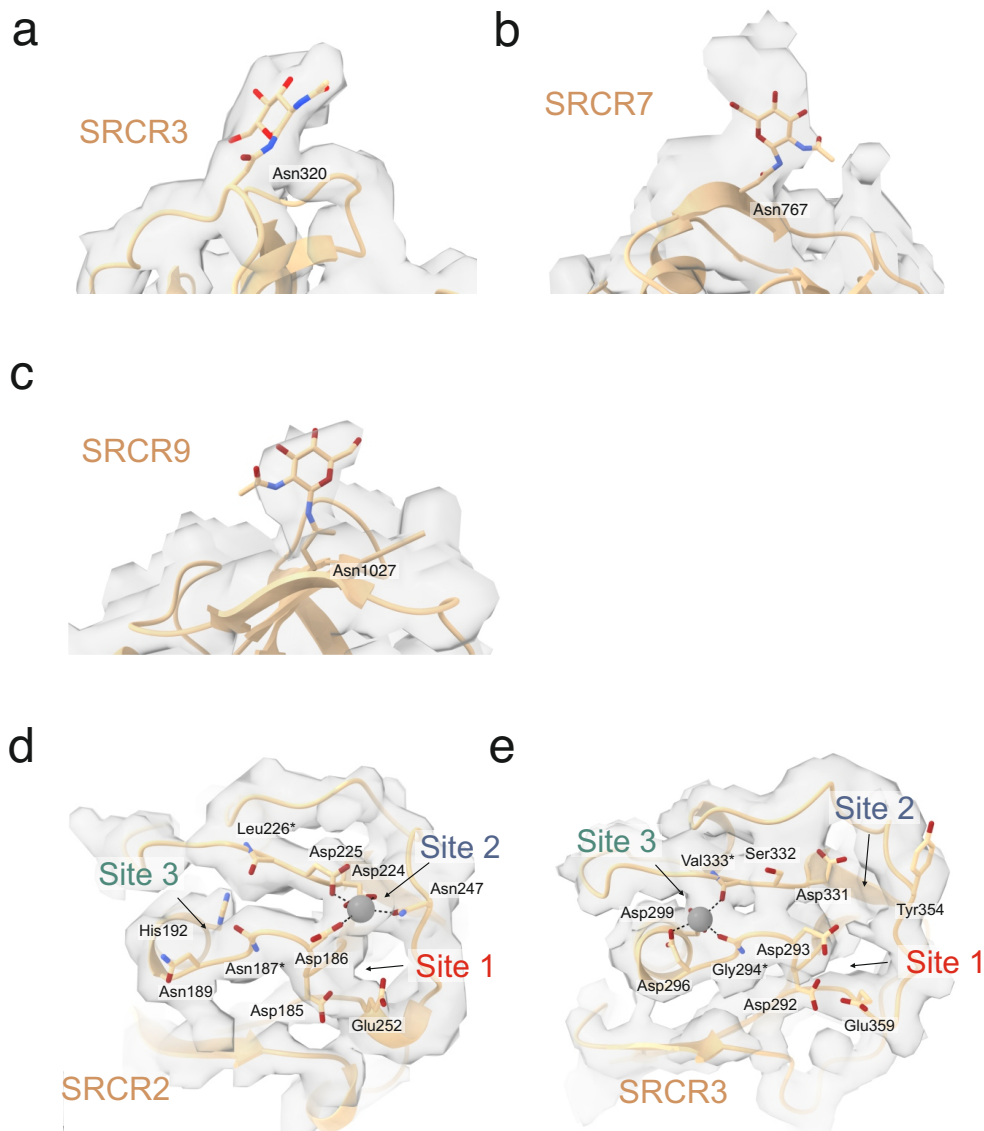

**Supplementary Figure 4. Cryo-EM densities of N-linked glycosylations and Ca<sup>2+</sup> ions. a-c.** Density maps of CD163<sub>A</sub> SR3CR3 (a), SR3CR7 (b) and SR3CR9 (c). Asparagine residues and N-acetylgalactosamines are shown as sticks. **d+e.** Density maps of CD163<sub>A</sub> SR3CR2 (d) and CD163<sub>A</sub> SR3CR3 (e). Residues constituting the three canonical Ca<sup>2+</sup>-binding sites are shown as sticks.

### Supplementary Figure 5

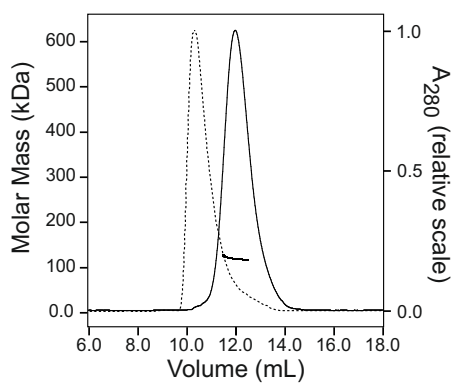

**Supplementary Figure 5. Oligomerization of CD163 1-9 D745A/D746A/D955A/D956A.** SEC-MALS analysis of CD163 SRCR 1-9 **D745A/D746A/D955A/D956A**. The measured molecular weights of the chromatogram peaks are shown as thick lines. A chromatogram of wild-type CD163 SRCR 1-9 is shown with dashes for comparison.

### Supplementary Figure 6

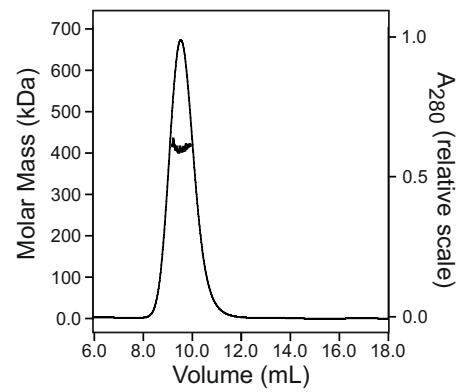

**Supplementary Figure 6. Trimerization of CD163-CC.** SEC-MALS analysis of CD163-CC is shown, with the measured molecular weight of the chromatogram peak represented by a thick line. The monodisperse peak in the chromatogram confirms that CD163-CC forms an intact trimer, with a measured molecular weight of approximately 410 kDa, closely matching the expected weight of 420 kDa.

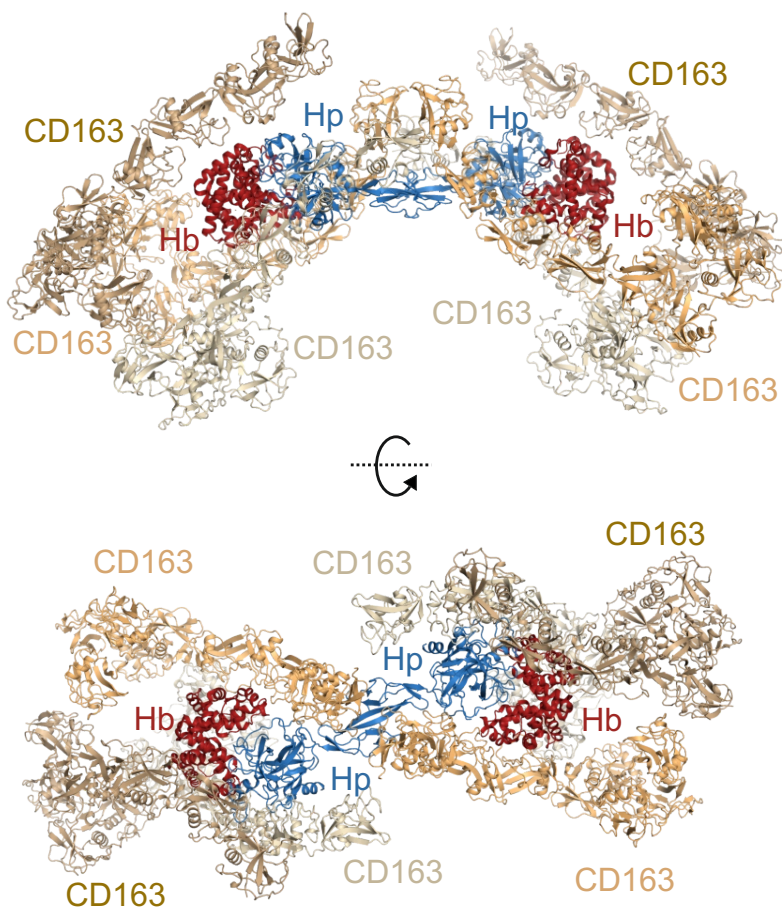

**Supplementary Figure 7. Model of CD163 Trimers Bound to Dimeric Hp(1-1)Hb.**

Cartoon representation of a model of CD163 trimers (orange) bound to both ends of the dimeric Hp(1-1)Hb complex (blue/red). The bottom figure is rotated 90 degrees relative to the top view. The position of CD163 SRCR1 was modeled based on the AlphaFold2 structural prediction of CD163.



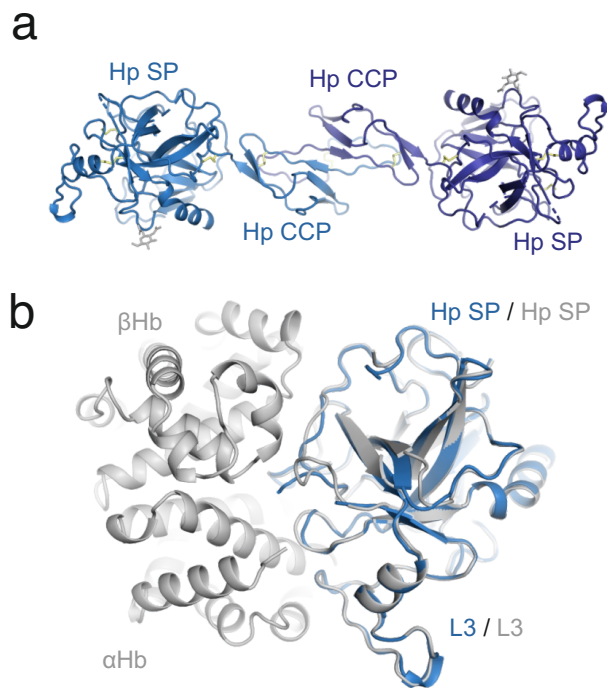

**Supplementary Figure 8. Structure of human Hp.** **a.** Cartoon representation of the crystal structure of dimeric human Hp(1-1). The two subunits are colored light blue and dark blue, respectively. Disulfide bridges are shown as yellow sticks and N-linked glycosylations as grey sticks. **b.** Superimposition of Hp (light blue) and  $\alpha\beta$ Hb-bound Hp (grey).

|                                                     | CD163 <sub>2</sub> -HpHb<br>(EMDB-50444)<br>(PDB 9FHB) | CD163 <sub>2</sub> -HpHb<br>(EMDB-50570)<br>(PDB 9FMU) | CD163 <sub>3</sub> -HpHb<br>(EMDB-50600)<br>(PDB 9FNO) |
|-----------------------------------------------------|--------------------------------------------------------|--------------------------------------------------------|--------------------------------------------------------|
| <b>Data collection and processing</b>               |                                                        |                                                        |                                                        |
| Detector                                            | Gatan K2 summit                                        | Gatan K2 summit                                        | Gatan K2 summit                                        |
| Voltage (kV)                                        | 300                                                    | 300                                                    | 300                                                    |
| Electron exposure (e <sup>-</sup> /Å <sup>2</sup> ) | 90                                                     | 90                                                     | 90                                                     |
| Defocus range (μm)                                  | 500-1500                                               | 500-1500                                               | 500-1500                                               |
| Pixel size (Å)                                      | 1.06                                                   | 1.06                                                   | 1.06                                                   |
| Initial particle images (no.)                       | 792,048                                                | 792,048                                                | 792,048                                                |
| Final particle images (no.)                         | 57,262                                                 | 32,511                                                 | 109,254                                                |
| Map resolution (Å)                                  | 3.87                                                   | 4.46                                                   | 5.20                                                   |
| FSC threshold                                       | 0.143                                                  | 0.143                                                  | 0.143                                                  |
| <b>Refinement</b>                                   |                                                        |                                                        |                                                        |
| Model composition                                   |                                                        |                                                        |                                                        |
| Non-hydrogen atoms                                  | 6755                                                   |                                                        |                                                        |
| Protein residues                                    | 6625                                                   |                                                        |                                                        |
| Ligands                                             | 130                                                    |                                                        |                                                        |
| R.m.s. deviations                                   |                                                        |                                                        |                                                        |
| Bond lengths (Å)                                    | 0.005                                                  |                                                        |                                                        |
| Bond angles (°)                                     | 0.951                                                  |                                                        |                                                        |
| Validation                                          |                                                        |                                                        |                                                        |
| MolProbity score                                    | 2.41                                                   |                                                        |                                                        |
| Clashscore                                          | 16.23                                                  |                                                        |                                                        |
| Poor rotamers (%)                                   | 2.82                                                   |                                                        |                                                        |
| Ramachandran plot                                   |                                                        |                                                        |                                                        |
| Favored (%)                                         | 95.07                                                  |                                                        |                                                        |
| Allowed (%)                                         | 4.11                                                   |                                                        |                                                        |
| Disallowed (%)                                      | 0.82                                                   |                                                        |                                                        |

**Supplementary Table 1. Cryo-EM data collection, refinement and validation statistics.**

| SRCR structure in the Protein Data Bank |               |                |                                                      | Crystallization conditions |                  |
|-----------------------------------------|---------------|----------------|------------------------------------------------------|----------------------------|------------------|
| ID                                      | Name          | Site occupancy | Sequence (site1,site2,site3)                         | Ca <sup>2+</sup>           | Mg <sup>2+</sup> |
| 8J8T                                    | hDMBT1 SRCR11 | ① ② ③          | VCDDYWDTNDV VLDDVRC HNCG---HHE <sup>E</sup> DAGVICS  | 200 mM                     | 0 mM             |
| 6SAN                                    | hDMBT1 SRCR8  | ① ② ③          | VCDDSWDTNDV VLDDVRC HNCG---HSE <sup>E</sup> DAGVICS  | 10 mM                      | 10 mM            |
| 7DPX                                    | hSCARA1 SRCR  | ①              | ICDDRWEVVRVW WLNEVFC RACS---HSE <sup>E</sup> DAGVTCT | 2 mM                       | 0 mM             |
| 6J02                                    | mSCARA1 SRCR  | ①              | ICDDRWDIRAG WLNEVMC LSCS---HSE <sup>E</sup> DAGVTCT  | 10 mM                      | 0 mM             |
| 7C00                                    | hSCARA5 SRCR  | ① ② ③          | VCDDGWDKKG WMDDVAC TNCG---HAE <sup>E</sup> DASVTCN   | 1.5 mM                     | 0 mM             |
| 7BZZ                                    | mSCARA5 SRCR  | ① ② ③          | VCDDGWDKKG WMDDVNC TNCG---HAE <sup>E</sup> DAGVTCT   | 1.5 mM                     | 0 mM             |
|                                         |               |                |                                                      |                            |                  |
| 6SA4                                    | hDMBT1 SRCR1  | 1 2 ③          | VCDDSWDTNDV ALDDVRC HNCG---HGE <sup>E</sup> DAGVICS  | 0 mM                       | 200 mM           |
| 6SA5                                    | hDMBT1 SRCR8  | 1 2 ③          | VCDDSWDTNDV VLDDVRC HNCG---HSE <sup>E</sup> DAGVICS  | 0 mM                       | 200 mM           |
| 2OY3                                    | MARCO SRCR    | ① ③            | ICDDDWNNDA WLDNVNC HNCV---HNE <sup>E</sup> DAGVECS   | 0 mM                       | 0 mM*            |
|                                         |               |                |                                                      |                            |                  |
| 8J8D                                    | hDMBT1 SRCR11 | 1 2 3          | VCDDYWDTNDV VLDDVRC HNCG---HHE <sup>E</sup> DAGVICS  | N/A                        | N/A              |
| 8H7J                                    | pCD163 SRCR5  |                | VCDSDFSLEAA WAEFQC GTCS---HSRDVGVVCS                 | N/A                        | N/A              |
| 8H7J                                    | pCD163 SRCR6  |                | LCNSHWDMEDA WRHMFHC SLCS---SGQVASVICS                | N/A                        | N/A              |
| 8H7J                                    | pCD163 SRCR7  | 1 ③            | ICDDSWDLNDA WLDEINC HNCR---HKE <sup>E</sup> DAGVICS  | N/A                        | N/A              |
| 8H7J                                    | pCD163 SRCR8  |                | VGRNSMSPATV WVDNVQC RLAS---PSEETWITCA                | N/A                        | N/A              |
| 8H7J                                    | pCD163 SRCR9  | 1 ③            | VCDDSWLEDA WLNEVKC SDCG---HKE <sup>E</sup> DAAVTCS   | N/A                        | N/A              |
| 6K0L                                    | sCD163 SRCR5  |                | VCDSDFSLEAA WTEFQC GTCS---HSRDVGVVCS                 | 0 mM                       | 0 mM             |
| 6K0O                                    | CD163L1 SRCR8 |                | VCDSDFSLEAA WAEKFC DTCT---HSREVGVCVCS                | 0 mM                       | 0 mM             |
| 5HRJ                                    | pCD163 SRCR5  |                | VCDSDFSLEAA WAEFQC GTCS---HSRDVGVVCS                 | 0 mM                       | 0 mM             |
| 5JFB                                    | pCD163 SRCR5  |                | VCDSDFSLEAA WAEFQC GTCS---HSRDVGVVCS                 | 0 mM                       | 0 mM             |
| 6H8M                                    | Neurotrypsin  | 1              | ICDDGWTDKHA HMDNVKC HNCR---HSE <sup>E</sup> DAGVICD  | 0 mM                       | 0 mM             |
| 5A2E                                    | CD6 SRCR1     |                | ACGALWDSRAA GAPALLC HACRS-DGRRARVTCA                 | 0 mM                       | 0 mM             |
| 5A2E                                    | CD6 SRCR2     | 1 ③            | VCDDTWLEDA HRDQVNC HYCG---HKE <sup>E</sup> DAGAVCS   | 0 mM                       | 0 mM             |
| 5A2E                                    | CD6 SRCR3     |                | VCDSEWYPSEA -RMYYS NLCS---QSLAARVLCS                 | 0 mM                       | 0 mM             |
| 5ZE3                                    | LOXL2 SRCR3   | 1              | VCDDKWDLVSA HLNIEQC QGCN---HEE <sup>E</sup> DAGVRCN  | 0 mM                       | 0 mM             |
| 5ZE3                                    | LOXL2 SRCR4   |                | VCGQNWGIVEA VMGKVC VACPQGGVQYAGAVACS                 | 0 mM                       | 0 mM             |
| 2OYA                                    | MARCO SRCR    | 1 ③            | ICDDDWNNDA WLDNVNC HNCV---HNE <sup>E</sup> DAGVECS   | 0 mM                       | 0 mM             |
| 1BY2                                    | Gal3bp SRCR   |                | VCDNLWDLTDA MLDEVQC SNCR---HERDAGVVCT                | 0 mM                       | 0 mM             |

**Supplementary Table 2. Overview of SRCR structures and Ca<sup>2+</sup>-site occupancy.** Table of SRCR structures in the protein data bank. In column 3, numbered grey spheres represent occupied Ca<sup>2+</sup>-binding sites and numbers represent unoccupied intact canonical sites. (\*) The crystals may contain traces of Mg<sup>2+</sup> from purification. The content of the crystallization buffer is not available for unpublished structures (N/A).

| hHp                                                 |                  |
|-----------------------------------------------------|------------------|
| <b>Data collection</b>                              |                  |
| Space group                                         | C2               |
| Cell dimensions                                     |                  |
| <i>a</i> , <i>b</i> , <i>c</i> (Å)                  | 89.9, 77.7, 65.1 |
| $\alpha$ , $\beta$ , $\gamma$ (°)                   | 90.0, 92.5, 90.0 |
| Wavelength                                          | 1.038            |
| Resolution (Å)                                      | 50-2.5 (2.6-2.5) |
| <i>R</i> <sub>sym</sub>                             | 0.047 (0.218)    |
| <i>I</i> / $\sigma$ <i>I</i>                        | 20.23 (5.45)     |
| Completeness (%)                                    | 95.6 (67.2)      |
| Redundancy                                          | 4.18 (3.18)      |
| <b>Refinement</b>                                   |                  |
| Resolution (Å)                                      | 2.5              |
| No. reflections                                     | 14717            |
| <i>R</i> <sub>work</sub> / <i>R</i> <sub>free</sub> | 0.191 / 0.227    |
| No. atoms                                           |                  |
| Protein                                             | 2451             |
| Carbohydrate                                        | 14               |
| Water                                               | 93               |
| <i>B</i> -factors                                   |                  |
| Protein                                             | 53.7             |
| Carbohydrate                                        | 73.0             |
| Water                                               | 54.1             |
| R.m.s deviations                                    |                  |
| Bond lengths (Å)                                    | 0.002            |
| Bond angles (°)                                     | 0.585            |

**Supplementary Table 3. Data collection, phasing and refinement statistics.** Values in parentheses are for highest-resolution shell.
